# Supplementary material for: Characterization and expression analysis of the SPL gene family during floral development and abiotic stress in pecan (Carya illinoinensis)
Source: PeerJ. 2021 Dec 9;9:e12490. doi: 10.7717/peerj.12490 (PMC8667720; doi:10.7717/peerj.12490)
Supplement: Supplemental Information 2 [file peerj-09-12490-s002.xlsx]

## Sheet: Sheet1
Table S1 The specific primers of all CiSPL genes used for qRT-PCR analysis.
Gene Name	Gene Id	Foward Primer	Reverse Primer	amplification fragment length
CiSPL2a	CIL1138S0014	TCGGTTTTGTCAGCAGTGTAGC	CAGAGGATAGTCTTTTGTTTGGGT	286
CiSPL2b	CIL1486S0026	CCCAAAGGTCATTGTCGGTG	TCTGCTGCTTCCCATCATAAA	206
CiSPL3a	CIL0893S0386	CATCATCTGGCAGTGGAGGG	GCATTGCTGGCAGAACCTTT	170
CiSPL3b	CIL1086S0071	GATGCTGATTTCGCTGATGC	TCCTTTTCAATGTGAGCCTTCT	245
CiSPL4a	CIL1078S0073	GCAGATAATGGGAGAAAGAAAACAG	CAAACTCGGGTAGCTCATGGAAC	253
CiSPL4b	CIL1361S0046	GTATCATCGCCGTCATAGGGT	CTGACTTGTCTCCTTTGACTGTTG	256
CiSPL4c	CIL1118S0019	TGGAGGGTGTTGAGGACGAG	CCACGAGAACAACCTGAGCC	192
CiSPL5	CIL0909S0046	CGATGAGGGTAATGAGGGAGAAG	CGCCGCTGACTAAAACGACT	290
CiSPL6a	CIL1066S0023	AAAGAGCAGTTTCCCCATCG	TCGCTTTGTCAGCAAGGATG	227
CiSPL6b	CIL1182S0013	TAAGTGGCGAGGTTTGCTGT	TTGTAAGCAAGGATGGTGGTG	252
CiSPL6c	CIL1032S0023	TCGGGACTCGTCCTTCTTTG	GCGAATGTAACCCTGATGATGT	158
CiSPL6d	CIL0248S0001	GCATTCGTCTGGTGGAGTTTC	CGAGTCATTTTCCCGCTTC	271
CiSPL7a	CIL1369S0030	AAAGCCCTTCACGACCTCAG	GGATACGGTTAGAAGTGGGAGC	201
CiSPL7b	CIL0037S0017	GCGAAGGAAGCCTGGTGAT	CAAGAGCCGAGCCAAGAGTG	173
CiSPL8a	CIL1479S0028	GAGATTTCTAGGCCCGTGGAC	GTGGAACTCGCAGACCTTGTG	225
CiSPL8b	CIL1609S0008	AGACTGTTCGGCAGCAAAATG	CTGTGACGGGATGAAGGGAC	198
CiSPL9a	CIL1047S0099	TATTGTCCTCACGCTATGGGC	GATGTAGGGTTTTCAGAGTTGCTTT	217
CiSPL9b	CIL0987S0054	TCGTCGTCTGCTTCTCCACC	CCACCACCCCTCACCTTCTT	170
CiSPL9c	CIL1479S0027	CCCTCCTCCTCATCTTTGCC	TTCTTCGCTCGTTATGCCCT	253
CiSPL9d	CIL1312S0023	TGAGAGGGGGCAAAATGGT	GTGGTGAGGGAACTGAAGCG	205
CiSPL12a	CIL0118S0017	ATTTCTATGCTATGAGTGCTGCG	TCTTCTCCAATTCCCTCTTTTCT	258
CiSPL12b	CIL1028S0077	CGATTCTGTCAGCAGTGTAGTAGGT	CGATTCTGTCAGCAGTGTAGTAGGT	263
CiSPL12c	CIL0317S0003	GTATTGGATGCCCTAACTGACG	GACCACCATTGAAAGGATTGC	381
CiSPL12d	CIL1198S0043	TTGCGGTTTGTCAGGTAGAGG	CCAGAGTGTCAGGATGCGTTT	249
CiSPL13a	CIL1101S0006	CTTGGTCAGTTGGGTAATTCAGC	CCACAAATGGTTACTTGGGGAG	248
CiSPL13b	CIL1064S0113	ATGCCAGACTTCAAAACCAGC	CTCCTAGCCCCACCACTTTC	226
CiSPL13c	CIL0984S0053	TTGATGAGGGAAAGCGAAGC	CAACTGTGGATAGCCATTGTAAAGA	245
CiSPL13d	CIL1086S0008	CCCTTGGGGAGTTTGATGAG	GGACCTTGCGGAAATAGTTGT	178
CiSPL13e	CIL1145S0047	GTGGGCAGAAGAATAGAGGAGG	ACAACTGGGGTCTTAGAGTGGAG	274
CiSPL13f	CIL1515S0030	AGCAGAAAGTGGAAGGGGTG	GGTTGGATGTGTTGACAGAAGAT	100
CiSPL16a	CIL1230S0089	CAGCGGAGCAGAAAAAGAAAG	TCAACCTGACACATGGGGTAGT	187
CiSPL16b	CIL1294S0032	TTCATCCCCTTTCCGAGTTT	CTTCATTTTTCCCTTGTGCG	207
