# Supplementary material for: Characterization and expression analysis of the SPL gene family during floral development and abiotic stress in pecan (Carya illinoinensis)
Source: PeerJ. 2021 Dec 9;9:e12490. doi: 10.7717/peerj.12490 (PMC8667720; doi:10.7717/peerj.12490)
Supplement: Supplemental Information 4 [file peerj-09-12490-s004.xlsx]

## Sheet: Sheet1
Table S3 Transcriptome expression data for the 32 SPL genes in pecan during female flower development.
Gene name	FB1-1_FPKM	FB1-2_FPKM	FB1-FPKM	Log2(FB1-FPKM)	FB2-1_FPKM	FB2-2_FPKM	FB2-FPKM	Log2(FB2-FPKM)	FB3-1_FPKM	FB3-2_FPKM	FB3-FPKM	Log2(FB3-FPKM)	FL1-1_FPKM	FL1-2_FPKM	FL1-FPKM	Log2(FL1-FPKM)	FL2-1_FPKM	FL2-2_FPKM	FL2-FPKM	Log2(FL2-FPKM)
CiSPL2a	33.3501	35.7609	34.5555	5.11084	41.7074	42.9548	42.3311	5.40365	42.4776	43.1805	42.8291	5.42052	41.759	44.3912	43.0751	5.42878	34.4919	34.0739	34.2829	5.09942
CiSPL2b	33.3501	35.7609	34.5555	5.11084	41.7074	42.9548	42.3311	5.40365	42.4776	43.1805	42.8291	5.42052	41.759	44.3912	43.0751	5.42878	34.4919	34.0739	34.2829	5.09942
CiSPL3a	55.7396	46.7045	51.2221	5.67869	59.6487	58.6031	59.1259	5.88572	61.4953	67.0767	64.286	6.00643	29.551	53.4022	41.4766	5.37423	23.4209	18.2445	20.8327	4.38078
CiSPL3b	12.9523	14.0765	13.5144	3.75643	16.1647	15.5913	15.878	3.98896	18.5839	16.2506	17.4172	4.12244	20.2153	15.24	17.7277	4.14793	9.5323	9.5931	9.5627	3.25742
CiSPL4a	2.6534	3.5341	3.09375	1.62936	2.5586	3.0205	2.78955	1.48003	3.9484	3.7174	3.8329	1.93844	0.8356	0.4063	0.62095	-0.687451	2.4918	3.3165	2.90415	1.53812
CiSPL4b	22.605	24.9891	23.797	4.57271	21.8274	18.8037	20.3156	4.34451	20.0933	14.4131	17.2532	4.10879	105.358	102.243	103.801	6.69767	40.6346	41.7708	41.2027	5.36467
CiSPL4c	59.0217	66.0096	62.5157	5.96615	92.0095	73.1344	82.572	6.36758	71.7312	67.134	69.4326	6.11754	100.532	95.3559	97.9438	6.61388	61.8	53.1854	57.4927	5.84531
CiSPL5	2.759	2.8232	2.7911	1.48083	1.8169	1.4712	1.64405	0.717254	2.9983	2.2853	2.6418	1.40152	1.2469	1.8731	1.56	0.641546	0.9446	1.7163	1.33045	0.411914
CiSPL6a	13.7977	14.7902	14.294	3.83733	10.3023	9.8014	10.0518	3.32939	9.7339	11.4076	10.5708	3.40201	15.4762	26.2934	20.8848	4.38438	14.1884	15.3523	14.7704	3.88463
CiSPL6b	13.7977	14.7902	14.294	3.83733	10.3023	9.8014	10.0518	3.32939	9.7339	11.4076	10.5708	3.40201	15.4762	26.2934	20.8848	4.38438	14.1884	15.3523	14.7704	3.88463
CiSPL6c	4.4021	4.4945	4.4483	2.15325	3.2919	3.8015	3.5467	1.82648	2.7804	4.1221	3.45125	1.78712	5.2693	5.6008	5.43505	2.44229	5.4557	6.1156	5.78565	2.53248
CiSPL6d	6.1794	4.9794	5.5794	2.48011	4.8312	5.2671	5.04915	2.33604	6.8499	7.5812	7.21555	2.85111	7.2635	8.7798	8.02165	3.0039	7.288	7.0615	7.17475	2.84293
CiSPL7a	10.5093	10.42	10.4647	3.38745	9.9363	10.9763	10.4563	3.3863	11.4347	12.1456	11.7902	3.55951	9.2558	10.7012	9.9785	3.31882	14.7072	13.3041	14.0056	3.80794
CiSPL7b	10.5093	10.42	10.4647	3.38745	9.9363	10.9763	10.4563	3.3863	11.4347	12.1456	11.7902	3.55951	9.2558	10.7012	9.9785	3.31882	14.7072	13.3041	14.0056	3.80794
CiSPL8a	17.1469	21.9862	19.5665	4.29032	19.693	22.2095	20.9513	4.38896	22.3888	22.8787	22.6337	4.5004	41.332	37.5203	39.4261	5.30108	43.6944	42.6271	43.1608	5.43165
CiSPL8b	1.1619	1.3969	1.2794	0.355467	1.3429	1.9697	1.6563	0.727964	2.1557	2.4156	2.28565	1.1926	5.4613	5.1168	5.28905	2.40301	15.4877	15.7263	15.607	3.96412
CiSPL9a	33.4444	35.5577	34.501	5.10857	23.3659	29.2058	26.2858	4.71621	16.8503	17.1479	16.9991	4.08739	25.4459	24.7164	25.0812	4.64853	19.7634	19.3138	19.5386	4.28826
CiSPL9b	33.4444	35.5577	34.501	5.10857	23.3659	29.2058	26.2858	4.71621	16.8503	17.1479	16.9991	4.08739	25.4459	24.7164	25.0812	4.64853	19.7634	19.3138	19.5386	4.28826
CiSPL9c	3.1855	3.0194	3.10245	1.63341	1.8992	1.9523	1.92575	0.94542	1.2131	2.0211	1.6171	0.693409	4.2951	6.2713	5.2832	2.40141	10.1005	10.2257	10.1631	3.34527
CiSPL9d	3.1855	3.0194	3.10245	1.63341	1.8992	1.9523	1.92575	0.94542	1.2131	2.0211	1.6171	0.693409	4.2951	6.2713	5.2832	2.40141	10.1005	10.2257	10.1631	3.34527
CiSPL12a	15.8046	15.5565	15.6806	3.9709	15.0351	13.9853	14.5102	3.859	19.8391	18.6903	19.2647	4.26789	15.6569	16.3895	16.0232	4.00209	18.0298	18.4029	18.2163	4.18716
CiSPL12b	15.8046	15.5565	15.6806	3.9709	15.0351	13.9853	14.5102	3.859	19.8391	18.6903	19.2647	4.26789	15.6569	16.3895	16.0232	4.00209	18.0298	18.4029	18.2163	4.18716
CiSPL12c	16.1879	17.4812	16.8346	4.07335	16.632	15.711	16.1715	4.01538	19.1873	20.4714	19.8294	4.30957	18.1564	19.4817	18.8191	4.23412	22.2237	22.2903	22.257	4.47619
CiSPL12d	16.1879	17.4812	16.8346	4.07335	16.632	15.711	16.1715	4.01538	19.1873	20.4714	19.8294	4.30957	18.1564	19.4817	18.8191	4.23412	22.2237	22.2903	22.257	4.47619
CiSPL13a	14.0592	16.579	15.3191	3.93726	16.1298	16.3475	16.2386	4.02136	18.9892	20.6383	19.8137	4.30843	19.8184	23.8903	21.8544	4.44985	12.4939	13.0846	12.7892	3.67686
CiSPL13b	14.0592	16.579	15.3191	3.93726	16.1298	16.3475	16.2386	4.02136	18.9892	20.6383	19.8137	4.30843	19.8184	23.8903	21.8544	4.44985	12.4939	13.0846	12.7892	3.67686
CiSPL13c	13.2048	14.5051	13.855	3.79233	7.9852	11.4988	9.742	3.28422	6.5986	7.9856	7.2921	2.86633	23.7792	24.5357	24.1575	4.5944	39.6889	44.594	42.1414	5.39717
CiSPL13d	4.2196	4.7311	4.47535	2.162	3.5754	4.2859	3.93065	1.97477	5.2513	6.0831	5.6672	2.50264	7.192	11.3813	9.28665	3.21516	20.8707	19.0981	19.9844	4.3208
CiSPL13e	2.8668	1.736	2.3014	1.20251	1.7653	2.6646	2.21495	1.14727	3.5349	3.6975	3.6162	1.85447	1.3954	2.3063	1.85085	0.888188	3.8399	2.8579	3.3489	1.74369
CiSPL13f	5.8393	4.527	5.18315	2.37383	3.7217	4.2793	4.0005	2.00018	5.6081	7.3356	6.47185	2.69418	3.3839	3.8693	3.6266	1.85862	5.0069	2.9907	3.9988	1.99957
CiSPL16a	31.3509	31.2952	31.323	4.96915	28.5813	30.9364	29.7588	4.89525	34.924	35.7454	35.3347	5.14301	23.5405	31.994	27.7673	4.79531	46.8089	32.5024	39.6557	5.30945
CiSPL16b	71.1761	67.1529	69.1645	6.11196	58.528	60.1799	59.3539	5.89127	60.1924	63.8356	62.014	5.95452	83.0911	83.2018	83.1465	6.37758	128.806	123.624	126.215	6.97974
