# Supplementary material for: Characterization and expression analysis of the SPL gene family during floral development and abiotic stress in pecan (Carya illinoinensis)
Source: PeerJ. 2021 Dec 9;9:e12490. doi: 10.7717/peerj.12490 (PMC8667720; doi:10.7717/peerj.12490)
Supplement: Supplemental Information 5 [file peerj-09-12490-s005.xlsx]

## Sheet: Sheet1
Table S4 Transcriptome expression data of the pecan CiSPL genes during fruit development
Gene name	PEY1-FPKM	Log2(PEY1-FPKM)	PEY2-FPKM	Log2(PEY2-FPKM)	PEY3-FPKM	Log2(PEY3-FPKM)
CiSPL2a	2.75768	1.46346	2.18586	1.1282	4.31595	2.10968
CiSPL2b	0.946328	-0.0795872	0.56581	-0.821611	1.1709	0.227615
CiSPL3a	9.86821	3.30279	0.636417	-0.651955	0	＃
CiSPL3b	3.00142	1.58565	0.310109	-1.68915	0	＃
CiSPL4a	0.938361	-0.0917854	0.0274627	-5.18638	0	＃
CiSPL4b	0.264115	-1.92076	0	＃	0	＃
CiSPL4c	4.5592	2.18878	2.33784	1.22518	1.82189	0.865434
CiSPL5	2.40182	1.26413	1.70315	0.768209	3.17814	1.66818
CiSPL6a	1.11476	0.156731	0.426025	-1.23099	1.83698	0.877338
CiSPL6b	0.836405	-0.257726	0.479366	-1.0608	0.0857548	-3.54364
CiSPL6c	0.827869	-0.272525	0.140268	-2.83374	0.181418	-2.46261
CiSPL6d	0.0923679	-3.43647	0.059981	-4.05935	0.110556	-3.17714
CiSPL7a	10.5307	3.39653	5.8185	2.54065	3.92522	1.97277
CiSPL7b	5.7852	2.53237	2.77077	1.47029	5.77525	2.52988
CiSPL8a	1.65631	0.727971	0	＃	0	＃
CiSPL8b	0.616365	-0.698144	0	＃	0	＃
CiSPL9a	2.38795	1.25577	1.24885	0.320596	0.614041	-0.703594
CiSPL9b	4.25518	2.08922	2.86026	1.51615	1.72721	0.788447
CiSPL9c	0.163556	-2.61214	0.0270429	-5.20861	0	＃
CiSPL9d	0.222943	-2.16526	0	＃	0	＃
CiSPL12a	35.1447	5.13524	14.1687	3.82464	28.5042	4.8331
CiSPL12b	16.6737	4.0595	11.6138	3.53777	24.7087	4.62695
CiSPL12c	20.5818	4.3633	15.8614	3.98745	7.59193	2.92447
CiSPL12d	20.4257	4.35231	8.14357	3.02566	1.01369	0.0196153
CiSPL13a	0.30382	-1.71871	0.0261853	-5.2551	0.0336323	-4.89401
CiSPL13b	4.6395	2.21397	0.300978	-1.73227	0.178834	-2.48331
CiSPL13c	1.93364	0.951316	2.52534	1.33648	0.0851838	-3.55328
CiSPL13d	2.38402	1.2534	3.49783	1.80646	12.9162	3.69111
CiSPL13e	0.103835	-3.26763	0	＃	0	＃
CiSPL13f	1.02846	0.0404873	0.618169	-0.693928	0.129865	-2.94491
CiSPL16a	22.9766	4.5221	8.23111	3.04109	11.9063	3.57365
CiSPL16b	9.84561	3.29948	3.56418	1.83357	12.9922	3.69958
