# Supplementary material for: Characterization and expression analysis of the SPL gene family during floral development and abiotic stress in pecan (Carya illinoinensis)
Source: PeerJ. 2021 Dec 9;9:e12490. doi: 10.7717/peerj.12490 (PMC8667720; doi:10.7717/peerj.12490)
Supplement: Supplemental Information 7 [file peerj-09-12490-s007.xlsx]

## Sheet: 工作表 2
Table S6 The raw data for qRT-PCR analysis of 32 CiSPLs under drought stress
Gene	Ct values
	0h			6h			12h			24h
actin	22.07	22.15	22.12	22.0282	22.0398	21.7416	21.5117	21.883	23.0387	24.2711	24.129	24.9682
CiSPL7b	29.69	29.6308	29.81	27.86	28.1364	27.476	26.91	26.2775	26.4055	28.9153	28.8036	29.954
CiSPL12a	26.72	26.58	26.49	25.98	25.7477	25.9399	24.8243	24.2735	24.4134	28.2586	28.5027	28.9342
CiSPL6d	31.04	31.95	31.44	29.3203	30.2668	29.243	32.8046	31.7263	31.8156	34.59	34.147	35.9285
CiSPL12c	23.02	23.73	23.11	28.3913	28.4708	28.2081	26.7467	26.2708	26.6355	32.82	32.7782	32.9193
CiSPL3a	24.78	25.29	25.82	28.2459	28.2755	28.0768	28.8191	28.3334	28.2445	32.9267	33.0131	32.794
CiSPL5	28.33	29.38	29.05	33.1058	32.4566	31.2553	31.1671	30.6528	30.8394	32.8768	33.06	33.2539
CiSPL13c	28.13	28.48	28.36	33.9326	32.6278	32.9583	31.3696	30.6938	30.6035	34.8414	34.7595	34.78
actin	22.05	21.73	22.32	23.935	23.8944	22.9499	22.7207	22.9998	23.1019	22.6198	22.8832	23.051
CiSPL9b	27.73	27.48	27.69	30.6936	29.9438	29.8483	29.5837	29.9331	30.2396	29.6671	29.3651	30.2574
CiSPL6c	32.09	32.01	32.46	32.39	31.8473	32.44	26.5205	25.98	26.1945	28.48	27.9797	28.5202
CiSPL9a	27.22	27.02	27.24	29.7531	28.9216	29.3083	29.1841	28.9247	29.3397	32.1082	31.684	32.4517
CiSPL13b	26.25	26.49	26.79	29.932	29.9218	30.2964	30.423	30.0763	29.892	29.8408	29.1691	29.8246
CiSPL6a	27.52	27.51	27.73	29.4774	28.9317	29.8654	30.0009	29.8054	30.1408	31.6487	30.7411	31.6049
CiSPL4a	30.29	30.02	30.96	31.5795	30.4821	29.9213	31.4162	30.3172	31.1069	33.0418	32.7625	33.2666
actin	22.73	23.6	23.72	20.79	21.73	21.89	20.67	21.49	21.84	21.8	22.24	22.42
CiSPL12b	25.68	25.76	26.35	26.21	26.4	26.8	24.03	24.25	24.44	25.47	25.73	25.77
actin	22.09	22.21	21.97	23.41	23.0722	22.4818	23.6321	22.9847	22.6031	22.78	23.0278	22.4753
CiSPL13d	25.02	24.8	25.08	27.46	27.8942	27.5843	27.02	26.8631	26.4291	27.7822	28.2923	28.2964
CiSPL3b	26.23	26.76	26.53	26.69	27.1774	27.1142	26.85	26.9885	26.6687	29.6767	28.5719	28.5419
CiSPL13a	27.07	26.99	27.45	29.9257	29.5066	29.2688	30.0763	29.6747	29.7053	29.6315	29.5316	29.1034
CiSPL4c	25.58	25.44	25.62	27.9083	27.5352	26.7101	28.0609	26.9913	27.1008	28.5124	28.2195	28.2298
CiSPL2a	29.3	29.36	28.97	31.9279	30.6528	30.6011	30.4	29.6996	29.1163	30.4826	29.589	29.4235
CiSPL13e	27.94	27.71	28.17	26.9323	26.1264	25.6946	27.1415	26.5363	26.3361	29.4139	28.1783	28.1626
CiSPL6b	28.11	29.16	28.47	30.2927	30.1691	29.97	30.5407	29.9153	30.2326	32.3273	31.5986	31.3892
actin	22.36	22.12	21.68	22.3226	21.7916	21.5453	22.0972	21.9301	21.6554	22.1336	22.0415	21.9287
CiSPL12d	27.3	26.88	26.76	28.8239	28.487	28.1071	27.9308	27.3123	27.1653	27.9116	27.8345	27.351
CiSPL16a	23.86	24.2	24.05	27.7231	27.3253	27.0133	25.9246	25.1932	24.8647	24.434	24.5931	24.4054
CiSPL16b	27.7	26.43	26.45	27.4374	26.1906	26.0755	25.9219	24.7526	24.579	26.1271	25.4267	25.3168
CiSPL9d	33.24	33.7	32.47	35.553	34.9884	34.78	32.5727	32.06	31.8264	32.932	33.1175	32.394
CiSPL4b	29.81	29.24	28.34	27.925	27.6495	26.9021	28.9437	27.5766	27.4705	31.0523	30.3612	30.4487
CiSPL7a	28.29	28.41	28.32	25.8236	25.8119	25.2347	24.929	24.1236	23.9054	25.92	26.4642	26.1527
CiSPL9c	32.15	32.07	32.4	31.9239	31.906	31.4727	34.3701	33.9036	34.1826	32.3954	32.034	31.9413
actin	21.86	22.07	22.24	22.95	22.4	22.52	24.08	24.34	24.49	23.27	22.87	22.39
CiSPL8a	31.58	32.62	32.68	29.91	28.43	29.19	30.86	31.24	31.33	32.69	32.25	32.01
CiSPL2b	30.36	30.85	31.31	32.9	31.42	31.29	32.5	31.77	32.81	34.25	33.97	34.46
CiSPL13f	28.96	29.66	29.73	32.79	33.74	33.86	28.22	27.42	28.42	32.66	33.16	33.15
CiSPL8b	34.12	34.56	34.85	32.76	31.89	32.05	33.63	33.1	34.09	35.08	35.59	35.72

## Sheet: Sheet2
Table S6 The raw data of qRT-PCR analysis for 32 CiSPLs under drought stress
	Drought treatment
Gene name	Time after treatment (h)
	0h	Standard Deviation	6h	standard Deviation	12h	standard Deviation	24h	standard Deviation
CiSPL2a	1.00189	0.0761354	0.535461	0.17625	1.37451	0.130734	1.05331	0.232631
CiSPL2b	1.01304	0.198822	0.767813	0.290491	1.68427	0.397495	0.169284	0.0443709
CiSPL3a	1.03709	0.338179	0.118367	0.00513252	0.118685	0.0430755	0.0272642	0.0111858
CiSPL3b	1.00951	0.174861	1.4336	0.689292	1.63407	0.57341	0.318543	0.139243
CiSPL4a	1.02256	0.27417	2.61257	0.907186	1.33461	0.354695	0.292527	0.0394348
CiSPL4b	1.02575	0.285473	2.79998	0.483678	2.08845	0.806597	0.356372	0.0724417
CiSPL4c	1.00729	0.150059	0.522609	0.0551231	0.559604	0.107571	0.236763	0.0551373
CiSPL5	1.04149	0.373141	0.0956128	0.0520478	0.274566	0.109514	0.291824	0.0648011
CiSPL6a	1.00617	0.133175	0.833098	0.151142	0.357383	0.0319532	0.133696	0.0306754
CiSPL6b	1.03506	0.331063	0.606208	0.185904	0.646284	0.166697	0.180958	0.0583165
CiSPL6c	1.01911	0.250163	2.89375	0.448833	118.88	31.243	25.6829	2.50914
CiSPL6d	1.02759	0.287303	3.34514	1.03301	0.661612	0.101673	0.493821	0.153485
CiSPL7a	1.02031	0.249615	5.91927	1.04869	15.114	4.83153	4.45515	0.753246
CiSPL7b	1.00249	0.073869	3.28819	0.414991	9.58982	3.21874	7.14448	0.899615
CiSPL8a	1.03466	0.344416	13.3347	4.57145	10.5378	0.438159	1.70184	0.148018
CiSPL8b	1.00513	0.125905	7.21098	0.840983	8.99615	1.78835	0.894085	0.0941343
CiSPL9a	1.0058	0.134079	0.665143	0.13728	0.473623	0.0421742	0.0589526	0.0112078
CiSPL9b	1.01858	0.227055	0.536996	0.215255	0.392359	0.09846	0.412591	0.114238
CiSPL9c	1.03764	0.321085	1.22101	0.22387	0.238617	0.0689893	1.04932	0.105714
CiSPL9d	1.02852	0.279406	0.227316	0.00328171	1.80452	0.414009	1.24971	0.249455
CiSPL12a	1.00343	0.0999125	1.45855	0.24693	4.5525	1.7004	1.30684	0.197634
CiSPL12b	1.02588	0.28681	0.191142	0.0480797	0.817101	0.209773	0.529455	0.058376
CiSPL12c	1.0191	0.229822	0.0263463	0.000963795	0.113179	0.0514407	0.0069178	0.00191243
CiSPL12d	1.00414	0.112242	0.317042	0.0215549	0.64334	0.100148	0.604013	0.0911616
CiSPL13a	1.02026	0.240812	0.355679	0.044093	0.320738	0.0713732	0.335863	0.0402566
CiSPL13b	1.01257	0.194973	0.263087	0.0856224	0.154207	0.0288287	0.206701	0.0286903
CiSPL13c	1.00306	0.0968786	0.0328371	0.0144705	0.177617	0.0512649	0.059252	0.0200443
CiSPL13d	1.0114	0.18914	0.30561	0.121511	0.572965	0.111794	0.18338	0.0500704
CiSPL13e	1.01971	0.245582	6.06178	0.971759	4.7741	0.384601	1.05887	0.343017
CiSPL13f	1.01107	0.188292	0.0943804	0.028069	13.017	3.11124	0.149619	0.0249587
CiSPL16a	1.03269	0.327605	0.0894341	0.00412861	0.379343	0.115014	0.727173	0.0221475
CiSPL16b	1.04255	0.360291	1.11512	0.272423	3.20666	1.07484	2.36953	0.530439
