# Supplementary material for: Characterization and expression analysis of the SPL gene family during floral development and abiotic stress in pecan (Carya illinoinensis)
Source: PeerJ. 2021 Dec 9;9:e12490. doi: 10.7717/peerj.12490 (PMC8667720; doi:10.7717/peerj.12490)
Supplement: Supplemental Information 8 [file peerj-09-12490-s008.xlsx]

## Sheet: Sheet1
Table S7 The raw data of qRT-PCR analysis for 32 CiSPLs under salt stress.
Gene	Ct values
	0h			6h			12h			24h
actin	22.04	22.13	22.21	21.04	21.09	20.63	22.16	22.43	22.55	21.6	22.05	22.27
CiSPL7b	25.14	25.73	25.63	24.44	25.01	25.27	25.59	25.7	25.71	25.01	25.02	25.21
CiSPL12a	22.2	22.32	22.19	22.65	22.87	23.44	24.15	24.16	24.83	22.56	22.71	22.63
CiSPL6d	30.8	30.9	31.03	26.24	26.47	26.67	29.14	29.24	30.31	26.21	26.31	26.45
CiSPL12c	23.15	23.19	23.44	23.31	23.83	24.02	23.27	23.91	24.09	22.59	23.36	23.53
CiSPL3a	25.27	25.18	25.81	24.06	24.51	24.78	24.38	24.47	25	26.94	27.87	27.405
CiSPL3b	26.47	26.61	27.03	25.87	26.09	26.24	24.81	24.59	25.19	27.53	27.67	28.11
CiSPL9d	34.37	34.52	34.08	34.46	34.25	34.04	33.03	34.11	33.54	33.48	32.89	33.15
actin	21.36	21.8	21.17	21.48	22.28	21.11	22.37	22.1	22.14	22.38	22	22.63
CiSPL5	29.93	30.03	30.79	31.14	31.35	31.21	30.09	30.22	30.45	30.43	30.64	30.91
CiSPL13c	28.93	28.96	29.73	28.61	29.09	29.43	29.36	29.94	30.24	29.36	30.15	30.47
CiSPL9b	28.32	28.68	28.5	28.74	29.07	29.25	29.24	29.4	29.6	29.35	29.57	29.81
CiSPL13a	28.03	28.33	28.36	28.03	28.21	28.66	28.31	29.28	29.37	30.03	30.71	30.87
CiSPL9c	32.36	33.03	33.04	30.84	30.99	31.12	30.37	31.19	32.08	32.24	32.93	32.98
CiSPL8a	28.77	29.09	29.65	28.03	28.05	28.31	28.71	28.75	29.22	30.95	31.06	31.75
actin	21.73	22.2	22.35	21.67	20.99	21.02	22.66	22.65	22.98	22.31	22.68	23.19
CiSPL6c	33.06	33.03	33.68	31.26	32.01	31.72	31.75	31.77	31.81	33.43	34.03	34.01
CiSPL9a	27.66	27.71	27.82	28.07	28.31	28.36	27.64	27.68	27.74	29.66	29.71	30.18
CiSPL13b	26.7	26.74	26.76	26.82	27.16	27.22	27.14	27.47	27.53	29.23	30.01	30.31
CiSPL6a	28.07	28.37	28.41	27.62	27.75	28.1	26.33	27.21	27.43	29.41	29.51	30.15
CiSPL4a	31.3	31.46	31.63	29.56	30.03	30.21	29.47	29.55	30.45	34.38	34.73	35.03
CiSPL13d	25.65	25.95	26.07	27.12	27.3	27.62	26.48	26.54	27.05	27.67	27.76	27.82
actin	22.27	22.46	22.85	21.03	21.13	21.43	22.35	22.47	22.97	22.24	21.92	22.47
CiSPL4c	29.07	29.16	29.03	25.37	25.59	25.57	28.91	28.36	29.41	29.89	29.84	30.03
CiSPL2a	25.55	26.05	26.19	24.12	24.19	24.69	26.94	27.26	27.62	26.62	27.2	27.98
CiSPL13e	29.29	30.13	30.54	30.78	31.38	31.97	29.31	29.63	29.87	31.12	31.31	31.44
CiSPL6b	28.48	29.05	29.86	28.29	28.61	29.18	29.84	29.97	29.91	28.74	28.81	28.86
CiSPL12d	26.76	27.42	27.59	25.45	25.82	25.82	26.23	27.49	27.51	27.48	27.68	28.01
CiSPL16a	24.96	25.2	26	24.5	24.81	25.48	27.96	27.42	27.26	24.06	24.45	24.65
CiSPL16b	24.15	24.32	25.14	23.73	24.14	24.4	24.35	25.31	25.26	25.04	24.73	25.84
actin	25.46	24.88	25.41	25.54	25.24	25.89	25.08	24.86	25.57	23.81	24.58	24.85
CiSPL4b	30.15	30.77	30.99	33.05	33.33	33.82	32.46	31.88	32.67	34.17	33.91	34.01
CiSPL7a	27.05	27.52	27.38	29.19	29.08	29.94	31.79	32.21	32.33	28.54	28.98	29.43
CiSPL2b	31.9	31.55	31.14	32.93	33.6	33.16	33.63	33.65	33.28	32.46	32.5	32.93
CiSPL13f	28.91	28.78	28.42	31.79	31.34	32.17	29.4	29.15	29.96	28.95	29.49	30.06
actin	23.46	23.94	24.05	22.75	23.07	23.36	22.73	23.17	23.38	22.89	22.81	23.84
CiSPL12b	26.41	26.85	27.18	25.93	25.85	25.76	27.1	27.22	27.61	25.75	26.24	26.42
CiSPL8b	35.36	34.97	35.71	35.57	35.12	36.02	34.97	35.17	35.57	34.19	34.05	34.33

## Sheet: Sheet2
Table S7.The raw data of qRT-PCR analysis for 32 CiSPLs under salt stress.
Salt treatment (NaCl )
Gene name	Time after treatment (h)
	0h	standard Deviation	6h	standard Deviation	12h	standard Deviation	24h	standard Deviation
CiSPL2a	1.00425	0.111029	1.20524	0.0882523	0.414395	0.0290784	0.326395	0.0882242
CiSPL2b	1.04075	0.372506	0.401095	0.14394	0.251339	0.104952	0.267159	0.0660216
CiSPL3a	1.01237	0.189709	0.892256	0.328826	2.09413	0.294994	0.231527	0.0535107
CiSPL3b	1.00703	0.141765	0.691078	0.181462	4.32311	0.8802	0.431057	0.0485558
CiSPL4a	1.00472	0.116428	1.60074	0.275408	5.05655	1.16076	0.163475	0.0147754
CiSPL4b	1.06694	0.487017	0.184867	0.039702	0.292818	0.0371117	0.0566566	0.0218787
CiSPL4c	1.01854	0.246795	4.76591	0.54031	1.22594	0.319178	0.454213	0.06781
CiSPL5	1.0043	0.112113	0.608294	0.269442	1.69032	0.0614996	1.39988	0.0885111
CiSPL6a	1.00317	0.096973	0.757217	0.0813676	4.0571	1.45898	0.586772	0.0547648
CiSPL6b	1.02569	0.279891	0.543545	0.0913421	0.623286	0.146009	1.01443	0.149607
CiSPL6c	1.01391	0.213055	1.71619	0.532149	4.45674	0.506695	1.05927	0.196612
CiSPL6d	1.00016	0.0221556	9.75436	2.7402	3.14987	0.991884	21.7822	3.30427
CiSPL7a	1.0443	0.360382	0.274057	0.0377864	0.0325271	0.00740037	0.165663	0.0190392
CiSPL7b	1.01046	0.180744	0.657274	0.0836412	1.06503	0.099262	1.21594	0.209203
CiSPL8a	1.06405	0.411304	2.52759	1.24224	2.09648	0.524711	0.444963	0.0976688
CiSPL8b	1.03394	0.336687	0.52108	0.154546	0.655388	0.0586562	1.4839	0.496275
CiSPL9a	1.01008	0.168766	0.389158	0.0840512	1.6451	0.167599	0.359009	0.0471169
CiSPL9b	1.01699	0.234044	0.808311	0.21983	0.899736	0.0392992	0.881934	0.0571757
CiSPL9c	1.01081	0.174639	4.24161	1.79039	5.56302	2.74727	1.98937	0.21313
CiSPL9d	1.01347	0.209226	0.457478	0.0479946	2.0823	0.573159	2.09909	0.740105
CiSPL12a	1.0021	0.0804619	0.2739	0.10577	0.273077	0.0515765	0.6929	0.143312
CiSPL12b	1.00217	0.0796647	1.06825	0.162455	0.431062	0.0481836	1.05825	0.299271
CiSPL12c	1.00121	0.0599195	0.330807	0.122795	0.852356	0.142884	0.968381	0.11887
CiSPL12d	1.00891	0.164749	1.17786	0.130336	1.25372	0.501925	0.58141	0.0261985
CiSPL13a	1.04309	0.384478	1.10007	0.213341	1.05284	0.390853	0.37951	0.0412131
CiSPL13b	1.01808	0.225068	0.441347	0.0893548	1.02145	0.12304	0.180035	0.0254764
CiSPL13c	1.00436	0.1145	1.28072	0.22015	1.10704	0.269842	1.08873	0.203868
CiSPL13d	1.00184	0.0733587	0.212104	0.0930038	0.916239	0.0803832	0.436815	0.113678
CiSPL13e	1.02459	0.287593	0.155773	0.0441844	1.37321	0.126643	0.326026	0.0259066
CiSPL13f	1.03193	0.314052	0.148189	0.0100688	0.543596	0.0192071	0.323636	0.0360047
CiSPL16a	1.0099	0.167374	0.553314	0.109041	0.251554	0.112173	1.60616	0.0391622
CiSPL16b	1.00915	0.160881	0.544637	0.0655179	0.797692	0.223342	0.514092	0.107847
