# Supplementary material for: Characterization and expression analysis of the SPL gene family during floral development and abiotic stress in pecan (Carya illinoinensis)
Source: PeerJ. 2021 Dec 9;9:e12490. doi: 10.7717/peerj.12490 (PMC8667720; doi:10.7717/peerj.12490)
Supplement: Supplemental Information 9 [file peerj-09-12490-s009.xlsx]

## Sheet: Sheet1
Table S8 The identification of CiSPL genes from two versions of pecan genome
Gene Name	Gene Id	Best hit in the newly released pecan genome (Lovell et al., 2021)
CiSPL2a	CIL1138S0014	CiPaw.05G108800 Chr05 gene 12273932 12280431 . + .
		CiPaw.05G108800.1	Chr05 mRNA 12273932 12280431 . + .
		CiPaw.05G108800.2	Chr05 mRNA 12273932 12280431 . + .
		CiPaw.05G108800.3	Chr05 mRNA 12273932 12280431 . + .
CiSPL2b	CIL1486S0026	CiPaw.06G103300 Chr06 gene 29765725 29779472 . - .
		CiPaw.06G103300.1	Chr06 mRNA 29765725 29779472 . - .
		CiPaw.06G103300.2	Chr06 mRNA 29765725 29779472 . - .
		CiPaw.06G103300.3	Chr06 mRNA 29765725 29779302 . - .
CiSPL3a	CIL0893S0386	CiPaw.09G061900 Chr09 gene 6463708 6470670 . + .
		CiPaw.09G061900.1	Chr09 mRNA 6463761 6470670 . + .
		CiPaw.09G061900.2	Chr09 mRNA 6463708 6470670 . + .
		CiPaw.09G061900.3	Chr09 mRNA 6463794 6470670 . + .
		CiPaw.09G061900.4	Chr09 mRNA 6463796 6470670 . + .
CiSPL3b	CIL1086S0071	CiPaw.10G051000 Chr10 gene 5440794 5448278 . + .
		CiPaw.10G051000.1	Chr10 mRNA 5440794 5448278 . + .
		CiPaw.10G051000.2	Chr10 mRNA 5440862 5448277 . + .
		CiPaw.10G051000.3	Chr10 mRNA 5440862 5444663 . + .
CiSPL4a	CIL1078S0073	CiPaw.12G119600.1	Chr12 gene 29129378 29130361 . + .
CiSPL4b	CIL1361S0046	CiPaw.11G171300.1	Chr11 gene 41193389 41195200 . + .
CiSPL4c	CIL1118S0019	CiPaw.03G179400.1	Chr03 gene 27946152 27955479 . + .
CiSPL5	CIL0909S0046	CiPaw.08G180300.1 Chr08 gene 37974494 37976350 . - .
		CiPaw.08G180300.1	Chr08 mRNA 37974494 37976350 . - .
		CiPaw.08G180300.2	Chr08 mRNA 37974494 37976350 . - .
CiSPL6a	CIL1066S0023	CiPaw.05G123000 Chr05 gene 14172764 14174521 . + .
		CiPaw.05G123200.1	Chr05 mRNA 14172764 14174521 . + .
		CiPaw.05G123200.3	Chr05 mRNA 14196918 14201379 . + .
CiSPL6b	CIL1182S0013	CiPaw.06G093600 Chr06 gene 28704740 28710362 . - .
		CiPaw.06G093600.1	Chr06 mRNA 28704740 28710243 . - .
		CiPaw.06G093600.2	Chr06 mRNA 28704741 28710362 . - .
		CiPaw.06G093600.3	Chr06 mRNA 28704741 28710243 . - .
CiSPL6c	CIL1032S0023	CiPaw.11G056200.1 Chr11 gene 10983150 10991497 . - .
CiSPL6d	CIL0248S0001	CiPaw.12G010000 Chr12 gene 4947897 4958132 . + .
		CiPaw.12G010000.1	Chr12 mRNA 4948063 4958132 . + .
		CiPaw.12G010000.2	Chr12 mRNA 4947897 4958132 . + .
		CiPaw.12G010000.3	Chr12 mRNA 4948063 4958132 . + .
		CiPaw.12G010000.4	Chr12 mRNA 4948063 4958132 . + .
CiSPL7a	CIL1369S0030	CiPaw.02G088100 Chr02 gene 24980916 24992044 . + .
		CiPaw.02G088100.1	Chr02 mRNA 24980916 24992044 . + .
		CiPaw.02G088100.2	Chr02 mRNA 24980916 24991821 . + .
CiSPL7b	CIL0037S0017	CiPaw.01G155500.1	Chr01 gene 41123557 41141099 . + .
CiSPL8a	CIL1479S0028	CiPaw.13G030500.1	Chr13 gene 2949098 2952150 . + .
CiSPL8b	CIL1609S0008	CiPaw.14G024100.1	Chr14 gene 3026308 3028359 . + .
CiSPL9a	CIL1047S0099	CiPaw.10G027700.1	Chr10 gene 2762377 2767041 . + .
CiSPL9b	CIL0987S0054	CiPaw.09G031800.1	Chr09 gene 3215180 3218394 . + .
CiSPL9d	CIL1312S0023	CiPaw.14G024200 Chr14 gene 3051326 3055872 . - .
		CiPaw.14G024200.1	Chr14 mRNA 3051326 3055872 . - .
		CiPaw.14G024200.2	Chr14 mRNA 3051326 3055872 . - .
CiSPL9c	CIL1479S0027	CiPaw.13G030600.1	Chr13 gene 2963357 2969541 . - .
CiSPL12a	CIL0118S0017	CiPaw.07G123900 Chr07 gene 31984809 31993446 . - .
		CiPaw.07G123900.1	Chr07 mRNA 31984809 31993446 . - .
		CiPaw.07G123900.2	Chr07 mRNA 31984809 31993374 . - .
CiSPL12b	CIL1028S0077	CiPaw.08G084300.1 Chr08 gene 10423482 10432356 . + .
CiSPL12c	CIL0317S0003	CiPaw.01G130200.1	Chr01 gene 37417546 37426965 . + .
CiSPL12d	CIL1198S0043	CiPaw.02G070500.1	Chr02 gene 21329351 21338895 . + .
CiSPL13a	CIL1101S0006	CiPaw.11G005400 Chr11 gene 1032405 1035878 . + .
		CiPaw.11G005400.1	Chr11 mRNA 1032756 1035878 . + .
		CiPaw.11G005400.2	Chr11 mRNA 1032405 1035878 . + .
		CiPaw.11G005400.3	Chr11 mRNA 1032406 1035878 . + .
CiSPL13b	CIL1064S0113	CiPaw.12G044600 Chr12 gene 21064999 21068413 . - .
		CiPaw.12G044600.1	Chr12 mRNA 21064999 21068188 . - .
		CiPaw.12G044600.2	Chr12 mRNA 21064999 21068413 . - .
		CiPaw.12G044600.3	Chr12 mRNA 21064999 21068413 . - .
		CiPaw.12G044600.4	Chr12 mRNA 21064999 21068188 . - .
		CiPaw.12G044600.5	Chr12 mRNA 21064999 21068188 . - .
CiSPL13c	CIL0984S0053	CiPaw.05G107500 Chr05 gene 12130263 12134469 . + .
		CiPaw.05G107500.1	Chr05 mRNA 12130263 12134469 . + .
		CiPaw.05G107500.2	Chr05 mRNA 12130449 12134469 . + .
		CiPaw.05G107500.3	Chr05 mRNA 12130450 12134469 . + .
		CiPaw.05G107500.4	Chr05 mRNA 12130621 12134469 . + .
		CiPaw.05G107500.5	Chr05 mRNA 12130621 12134469 . + .
		CiPaw.05G107500.6	Chr05 mRNA 12130763 12134469 . + .
		CiPaw.05G107500.7	Chr05 mRNA 12130960 12134469 . + .
CiSPL13d	CIL1086S0008	CiPaw.06G104700 Chr06 gene 29963095 29965654 . - .
		CiPaw.06G104700.1	Chr06 mRNA 29963095 29965654 . - .
		CiPaw.06G104700.2	Chr06 mRNA 29963095 29965649 . - .
CiSPL13f	CIL1515S0030	CiPaw.04G039000.1	Chr04 gene 3277675 3280352 . - .
CiSPL13e	CIL1145S0047	CiPaw.03G057600.1	Chr03 gene 5262666 5264822 . - .
CiSPL16a	CIL1230S0089	CiPaw.08G078500.1	Chr08 gene 9347140 9353093 . + .
CiSPL16b	CIL1294S0032	CiPaw.07G130800 Chr07 gene 32937105 32944061 . - .
		CiPaw.07G130800.1	Chr07 mRNA 32937105 32944061 . - .
		CiPaw.07G130800.2	Chr07 mRNA 32937105 32944061 . - .
